# Supplementary material for: Automated Path Searching Reveals the Mechanism of Hydrolysis Enhancement by T4 Lysozyme Mutants
Source: MDPI journal article supplement (doi:10.3390/ijms232314628), 2022-11-23
Supplement: s1 [file s1]

# Automated Path Searching Reveals the Mechanism of Hydrolysis Enhancement by T4 Lysozyme Mutants

Kun Xi and Lizhe Zhu \*

Warshel Institute for Computational Biology, School of Life and Health Sciences, School of Medicine, The Chinese University of Hong Kong, Shenzhen, Shenzhen 518172, China

\* Correspondence: zhulizhe@cuhk.edu.cn

## Methods

### Generate Initial Structures of the Three T4L variants

By using the crystal structures of Ground (G) State (PDB ID:3DMV) [1] and Excited (E) State (PDB ID: 2LCB) [2] as the templates, the initial structures of the G and E states for other two T4L variants (L99A,G113A and L99A,G113A,R119P) were generated by homology modelling via Modeller [3] (the E state of T4L-L99A,G113A,R119P, PDB ID:2LC9 [1]).

### TAPS Optimization

The initial path of the G/E interconversion for the three T4L variants were generated by targeted molecular dynamics (MD) [4], see Table S1 for the parameter set. Then, the initial path was optimized by our recently-developed path searching method—the travelling-salesman based automated path searching method (TAPS) [5,6], see Table S2 for the details of the parameter set. The flowchart of the recently-matured TAPS method is shown in Figure S1.

### Free Energy Landscape Calculation

After the path optimization for the three T4L variants (convergence check by performing the calculation of multidimensional scaling (MDS) [7] and  $\sqrt{\langle z \rangle}$  [8–10] as shown in Figure S2), we chose the final converged path (the minimum free energy path) to perform umbrella sampling simulations [11–13]. Details for the parameter set are listed in Table S3. The free energy distribution of the sampling results along PCV-s is shown in Figure S3.

**Table S1 Details of the Targeted MD [4] for T4L-L99A, T4L-L99A,G113A, and. T4L-L99A,G113A,R119P in the Present Work.**

| Systems                           | T4L-L99A                                                                     | T4L-L99A,G113A                                                               | T4L-L99A,G113A,R119P                                                         |
|-----------------------------------|------------------------------------------------------------------------------|------------------------------------------------------------------------------|------------------------------------------------------------------------------|
| Protein Size                      | 2636 atoms                                                                   | 2639 atoms                                                                   | 2629 atoms                                                                   |
| Temperature (K)                   | 300                                                                          | 300                                                                          | 300                                                                          |
| Na <sup>+</sup> / Cl <sup>-</sup> | 10/18                                                                        | 10/18                                                                        | 10/17                                                                        |
| Water                             | 10331                                                                        | 10339                                                                        | 10332                                                                        |
| Target State                      | E state                                                                      | E state                                                                      | E state                                                                      |
| Structural alignment              | C $\alpha$ of $\alpha$ -helices/ $\beta$ -sheets (except for residue 92-140) | C $\alpha$ of $\alpha$ -helices/ $\beta$ -sheets (except for residue 92-140) | C $\alpha$ of $\alpha$ -helices/ $\beta$ -sheets (except for residue 92-140) |
| RMSD Calculation                  | Heavy atoms of residue 92-140                                                | Heavy atoms of residue 92-140                                                | Heavy atoms of residue 92-140                                                |
| Force Constant                    | 100, 000 kJ/mol/nm <sup>2</sup>                                              | 100, 000 kJ/mol/nm <sup>2</sup>                                              | 100, 000 kJ/mol/nm <sup>2</sup>                                              |
| Frame Record Frequency (ps)       | 0.2                                                                          | 0.2                                                                          | 0.2                                                                          |
| Total Sampling Time (ps)          | 200 ps                                                                       | 200 ps                                                                       | 200 ps                                                                       |

**Table S2.** The Parameters Used in TAPS<sup>a</sup> Optimization [5,6] for the Systems in the Present Work.

| Systems                              |                      | T4L-L99A                                                 | T4L-L99A,G113A                                           | T4L-L99A,G113A,R119P                                     |
|--------------------------------------|----------------------|----------------------------------------------------------|----------------------------------------------------------|----------------------------------------------------------|
| Sampling Time Each Iteration         |                      | 1000 ps                                                  | 1000 ps                                                  | 1000 ps                                                  |
| Temperature                          |                      | 300 K                                                    | 300 K                                                    | 300 K                                                    |
| Atoms Set                            | Structural alignment | Ca of $\alpha$ -helices/ $\beta$ -sheets (except 92-140) | Ca of $\alpha$ -helices/ $\beta$ -sheets (except 92-140) | Ca of $\alpha$ -helices/ $\beta$ -sheets (except 92-140) |
|                                      | RMSD calculation     | Heavy atoms of residue 92-140                            | Heavy atoms of residue 92-140                            | Heavy atoms of residue 92-140                            |
| Tolerant Distance for Neighbor Nodes |                      | 0.8 Å                                                    | 0.8 Å                                                    | 0.8 Å                                                    |
| Metadynamics Well-tempered           | Gaussian Height      | 0.25 kJ/mol                                              | 0.25 kJ/mol                                              | 0.25 kJ/mol                                              |
|                                      | Gaussian Width       | 0.50                                                     | 0.50                                                     | 0.50                                                     |
|                                      | Bias Factor          | 10                                                       | 10                                                       | 10                                                       |
|                                      | Length of tMD        | 30 ps                                                    | 30 ps                                                    | 30 ps                                                    |
| Force Constant of tMD                |                      | 100, 000 kJ/mol/nm <sup>2</sup>                          | 100, 000 kJ/mol/nm <sup>2</sup>                          | 100, 000 kJ/mol/nm <sup>2</sup>                          |

<sup>a</sup>Meaning of parameters in Refs. [5,6].**Table S3** Details of Umbrella Sampling [11] for the Systems in the Present Work.

| Systems                                     |                               | T4L-L99A                                                             | T4L-L99A,G113A                                                       | T4L-L99A,G113A,R119P                                                 |
|---------------------------------------------|-------------------------------|----------------------------------------------------------------------|----------------------------------------------------------------------|----------------------------------------------------------------------|
| Node Number in Final Path                   |                               | 54                                                                   | 52                                                                   | 51                                                                   |
| Insert Gap                                  |                               | 0.5                                                                  | 0.5                                                                  | 0.5                                                                  |
| Atoms Set                                   | Structural alignment          | Ca of $\alpha$ -helices/ $\beta$ -sheets (except for residue 92-140) | Ca of $\alpha$ -helices/ $\beta$ -sheets (except for residue 92-140) | Ca of $\alpha$ -helices/ $\beta$ -sheets (except for residue 92-140) |
|                                             | RMSD calculation              | Heavy atoms of residue 92-140                                        | Heavy atoms of residue 92-140                                        | Heavy atoms of residue 92-140                                        |
| Total Number of Nodes for Umbrella Sampling |                               | 108                                                                  | 104                                                                  | 102                                                                  |
| Umbrella Sampling PCV-based                 | Position for z-Wall Potential | 0.0064 nm <sup>2</sup>                                               | 0.0064 nm <sup>2</sup>                                               | 0.0064 nm <sup>2</sup>                                               |
|                                             | Force Constant for PCV-z      | 20, 000, 000.0 kJ/mol/nm <sup>2</sup>                                | 20, 000, 000.0 kJ/mol/nm <sup>2</sup>                                | 20, 000, 000.0 kJ/mol/nm <sup>2</sup>                                |
|                                             | Force Constant for PCV-s      | 120 kJ/mol                                                           | 120 kJ/mol                                                           | 120 kJ/mol                                                           |
|                                             | Sampling Time                 | 2 ns                                                                 | 2 ns                                                                 | 2 ns                                                                 |

<sup>a</sup>See Figures S3 for the results of umbrella sampling [11].

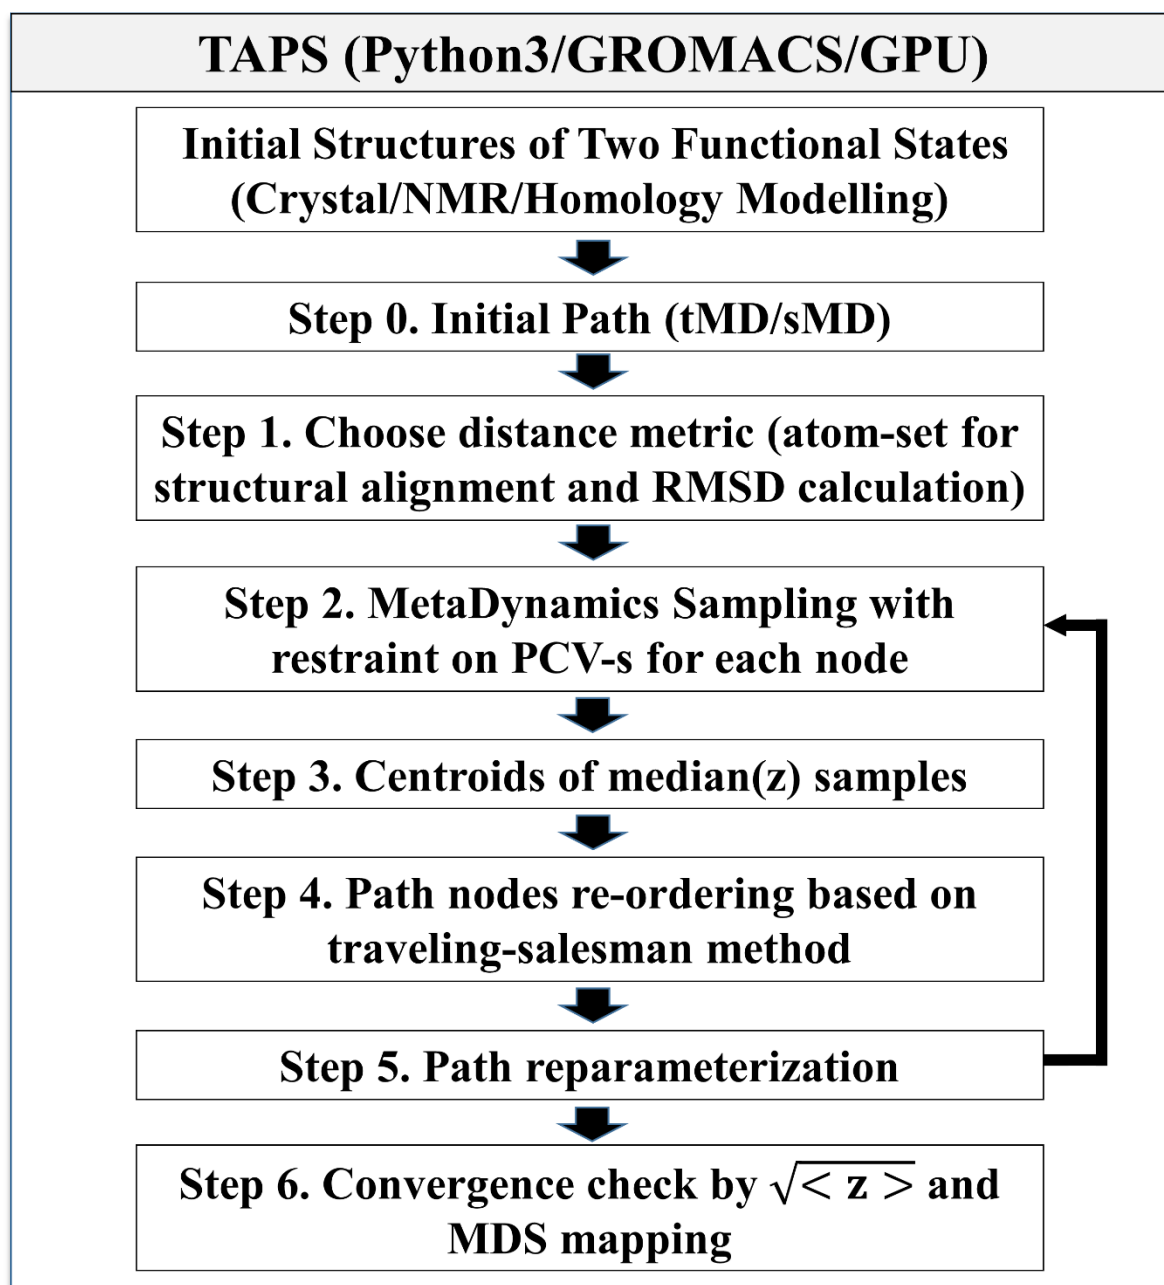

**Figure S1.** Flowchart of the Travelling-salesman Based Automated Path Searching (TAPS). The initial paths were obtained by targeted MD or steered MD. Well-tempered MetaD simulation for each node is performed parallel on the “progress component”  $s$  of the path-collective-variable (PCV) [8,14] with restraint potential on  $s$ . The backbone nodes of the new path correspond to the centroids of the sampled conformations of each node with the median value of the “deviation component”  $z$  of PCV. Re-ordering of these new nodes with a traveling-salesman scheme. Re-parameterization is finally performed to maintain the resolution of the new path (detailed in Ref [5,6]). Convergence is checked by  $\sqrt{\langle z \rangle}$  [8–10] and the visualization of the path nodes on a low-dimensional space obtained by multidimensional scaling (MDS) [7].

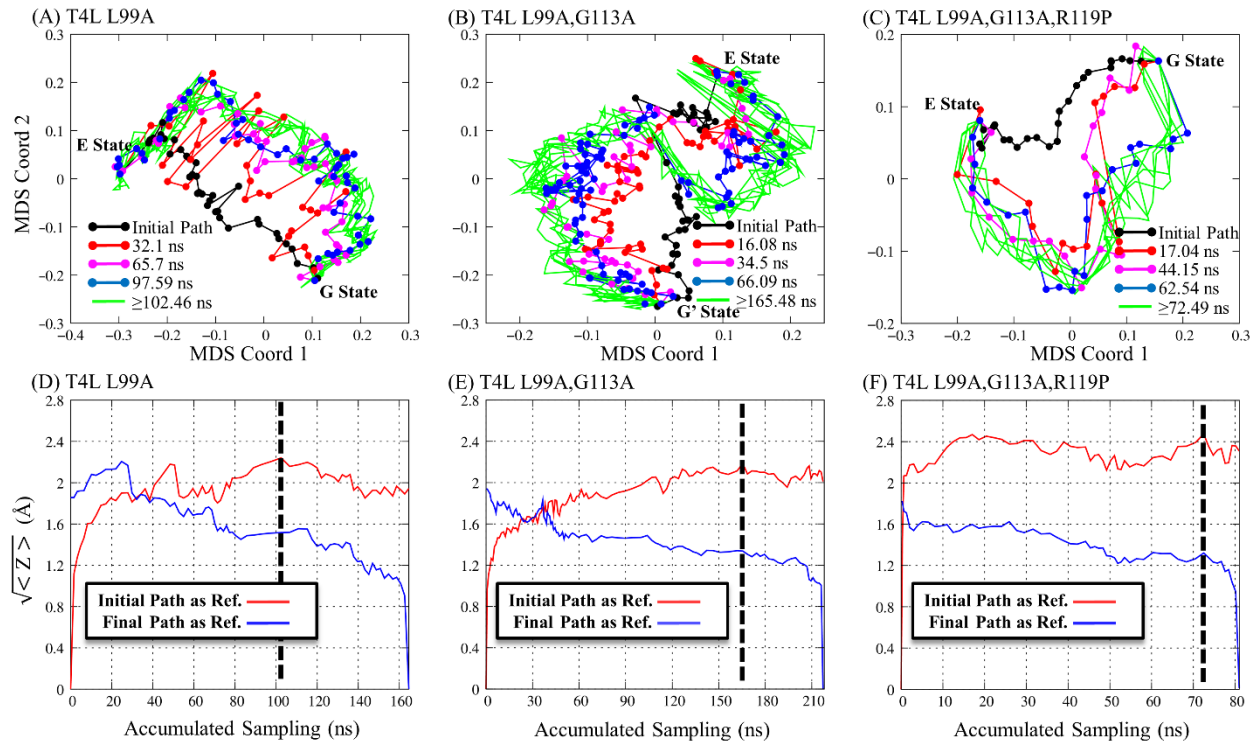

**Figure S2.** Convergence check. The paths at different TAPS iterations for the T4L-L99A (A), the T4L-L99A, G113A (B), and the T4L-L99A, G113A, R119P (C) are mapped to a two-dimensional space obtained by multidimensional scaling (MDS). The accumulated sampling time for each iteration (perpendicular sampling, additional targeted MD for path reparameterization) is highlighted by a different color. Convergence of the optimization processes for the T4L-L99A (D), the T4L-L99A,G113A (E), and the T4L-L99A,G113A,R119P (F) is measured by the progress of  $\langle z \rangle$  along the accumulated sampling time. Black and orange lines denote two different reference paths respectively: initial path (black) and final path (orange). Convergence time is highlighted by black dashed lines.

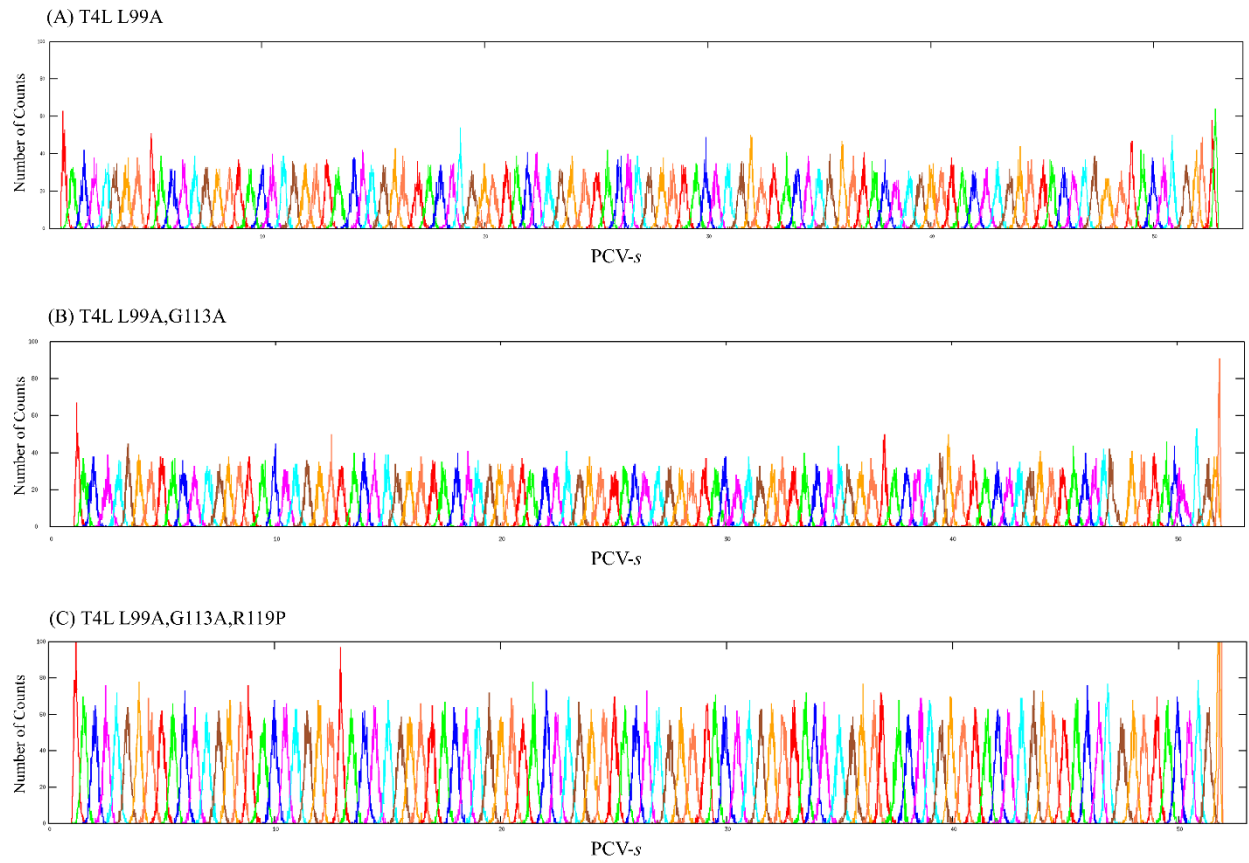

**Figure S3.** Sample distribution in all windows of the umbrella sampling [7] along the PCV-s for the T4L-L99A (A), the T4L-L99A,G113A (B), and the T4L-L99A,G113A,R119P (C). The initial 200 ps of sampling trajectory were disregarded, and only the last 1.8 ns of sampling was used for WHAM analysis.

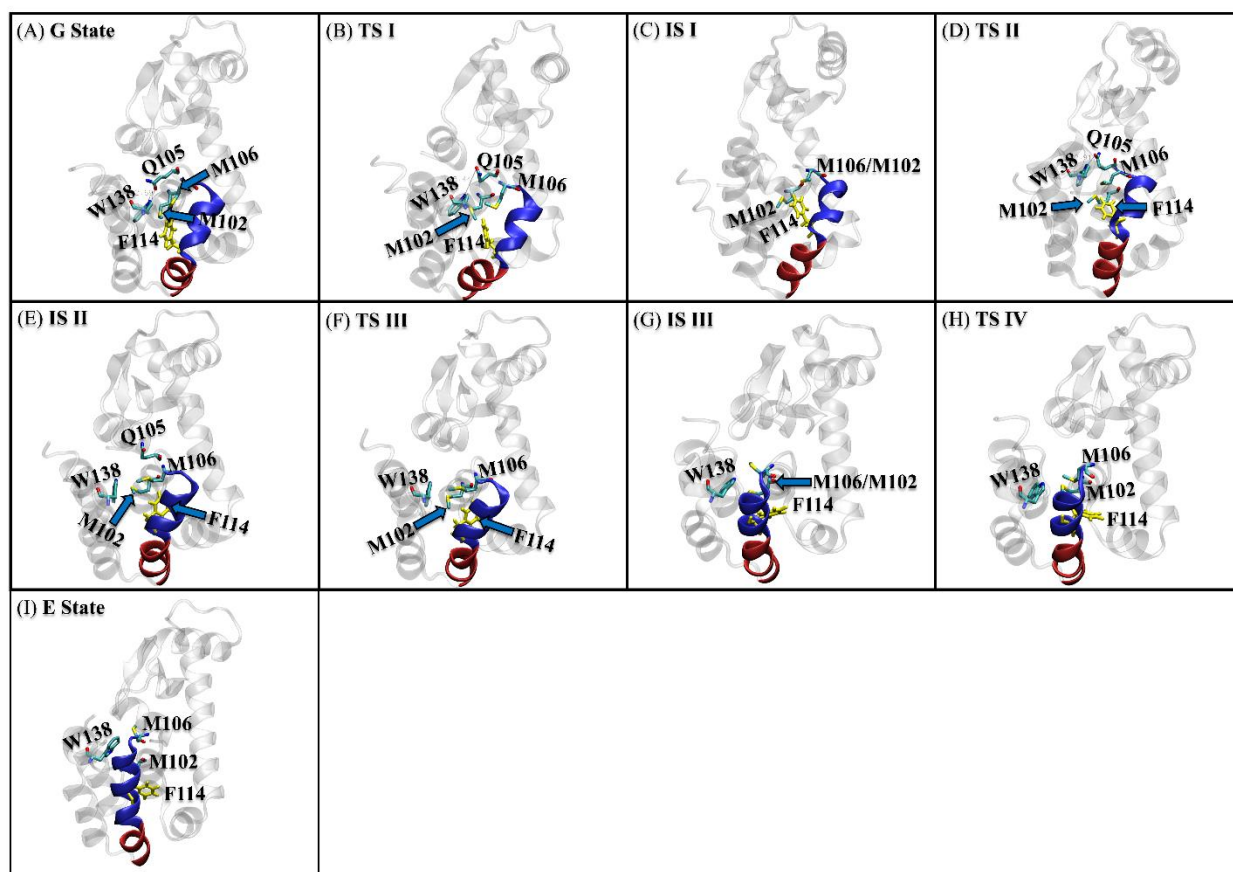

**Figure S4.** (A-I) Complete structures for the transition of the T4L-L99A system from G state to E state. The same ISs and TSs defined in Figure 2A are also shown here. All the structures were displayed by VMD [15].

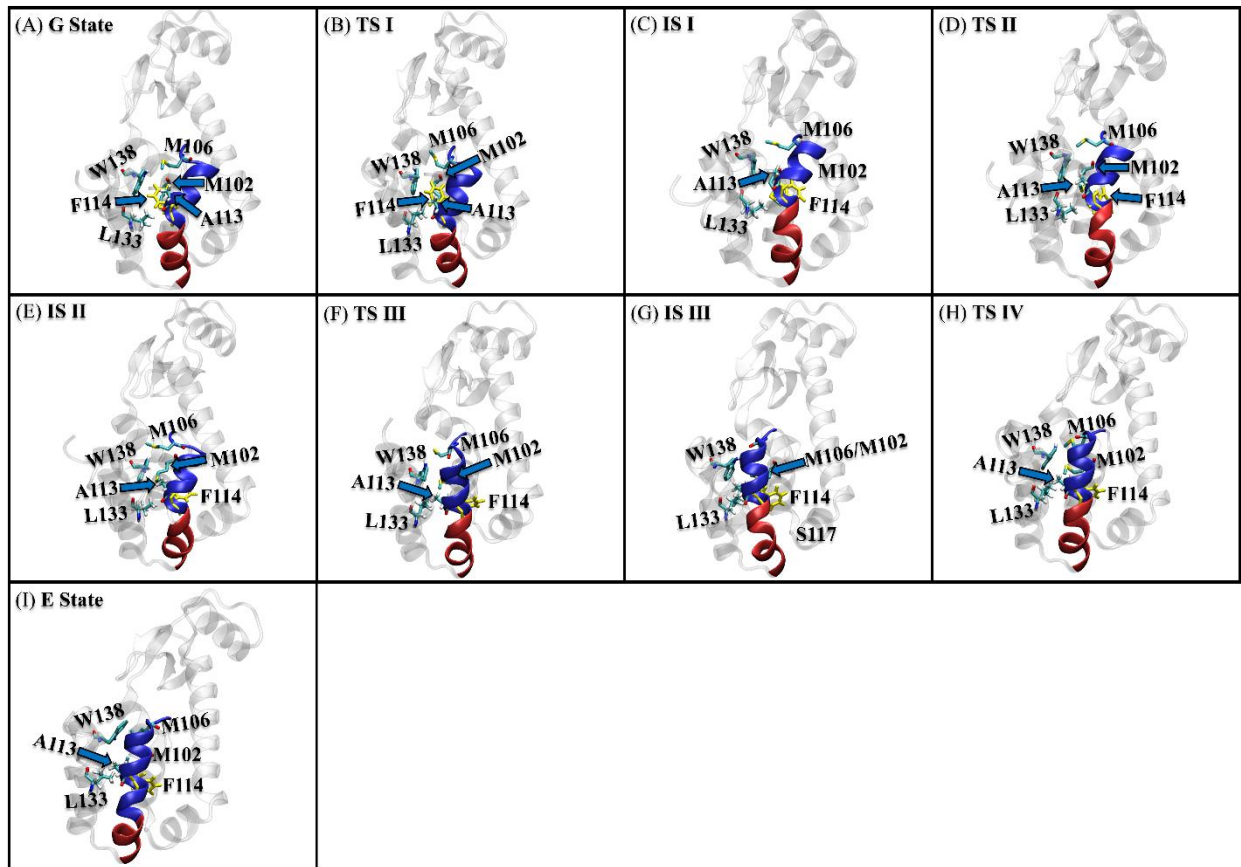

**Figure S5.** (A-I) Complete structures for the transition of the T4L-L99A,G113A mutant from G state to E state. The same ISs and TSs defined in Figure 2B are also shown here. All the structures were displayed by VMD [15].



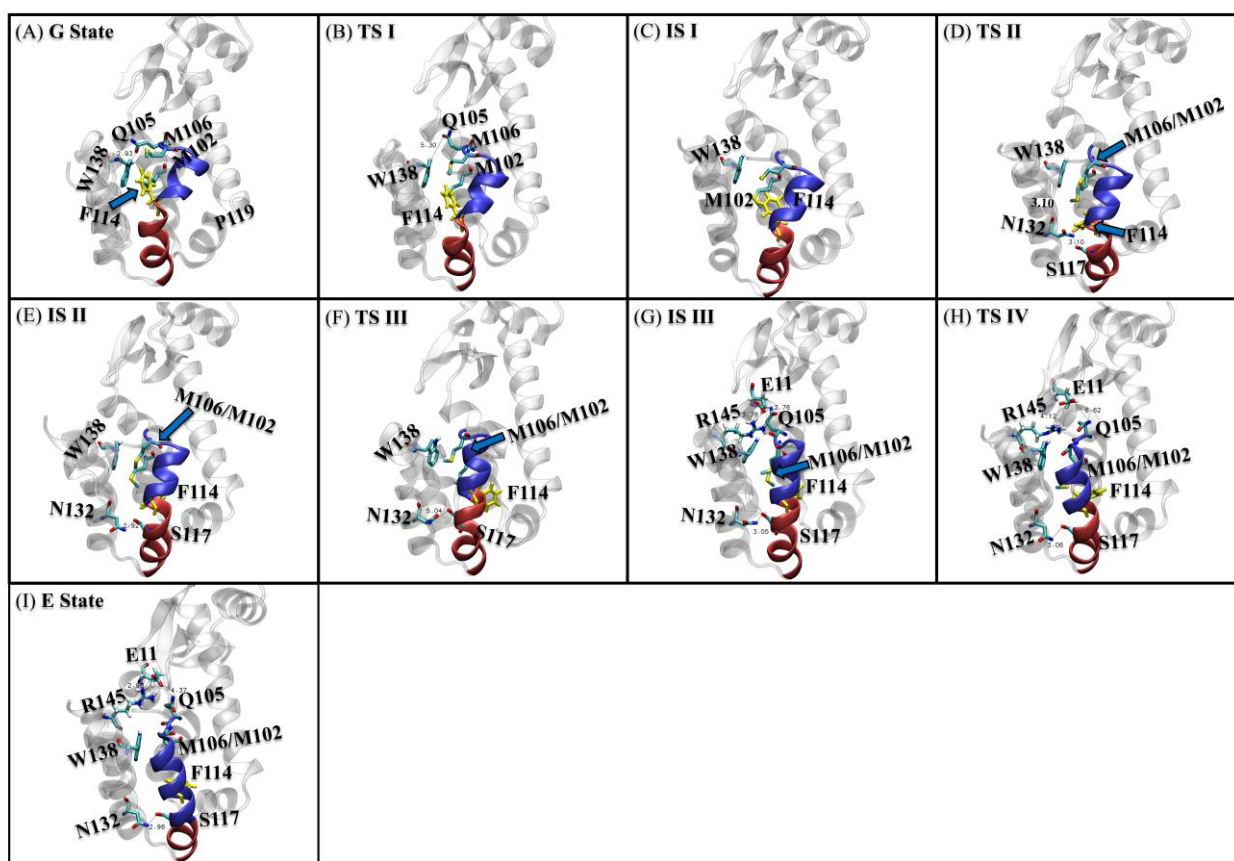

**Figure S6.** (A-I) Complete structures for the transition of the T4L-L99A,G113A,R119P mutant from G state to E state. The same ISs and TSs defined in Figure 2C are also shown here. All the structures were displayed by VMD [15].

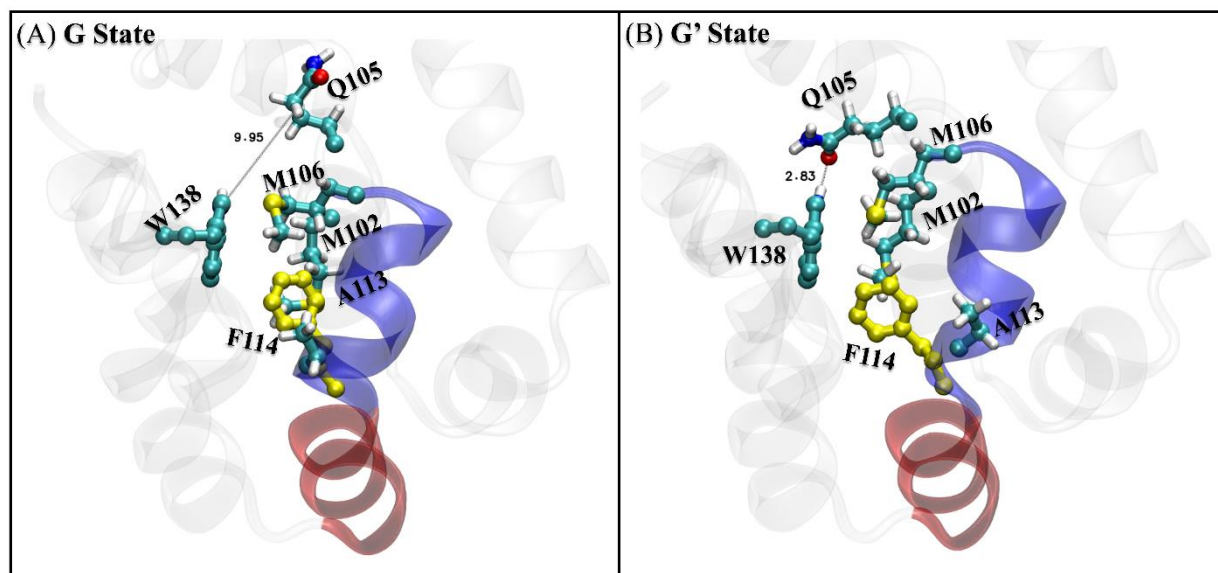

**Figure S7.** Details of the structures for the G state (A) identified in Figure 2B and the initial guess (G' state, B) for the T4L-L99A,G113A mutant. All the structures were displayed by VMD [15].



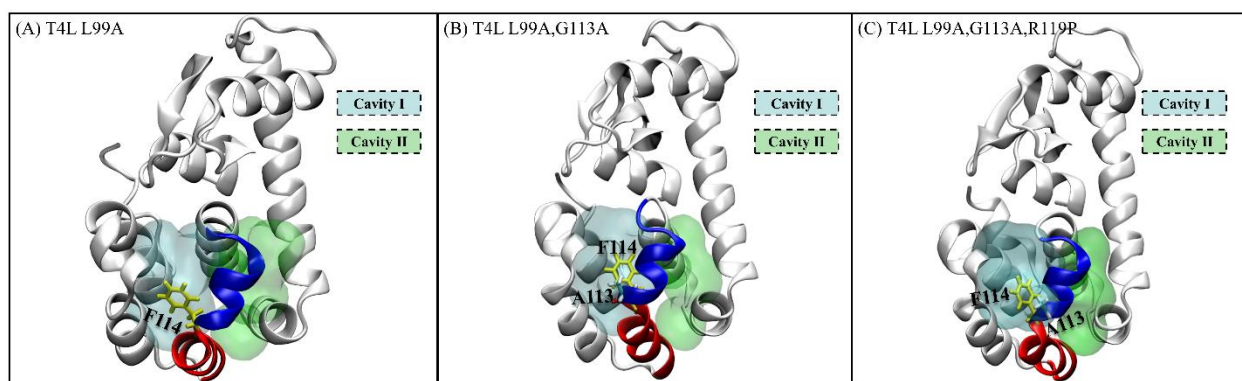

**Figure S8.** (A-C) Details of the structures for G state of the three T4L variants: the T4L-L99A (A), the T4L-L99A,G113A (B), and the T4L-L99A,G113A,R119P (C). The two hydrophobic cavities: Cavity I and Cavity II are highlighted by cyan and green colors respectively. All the structures were displayed by VMD [15].

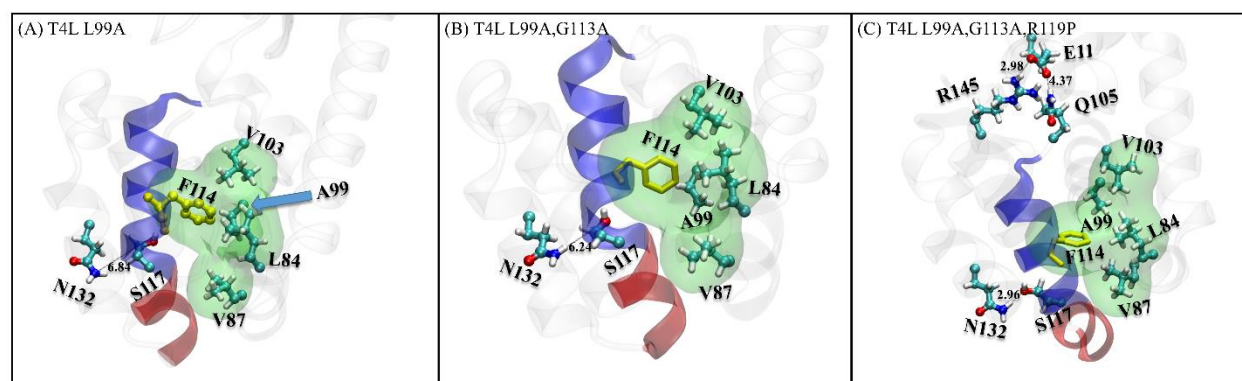

**Figure S9.** (A-C) Details of the structures for E state of the three T4L variants: the T4L-L99A (A), the T4L-L99A,G113A (B), and the T4L-L99A,G113A,R119P (C). The hydrophobic cavity II is highlighted by green color. All the structures were displayed by VMD [15].

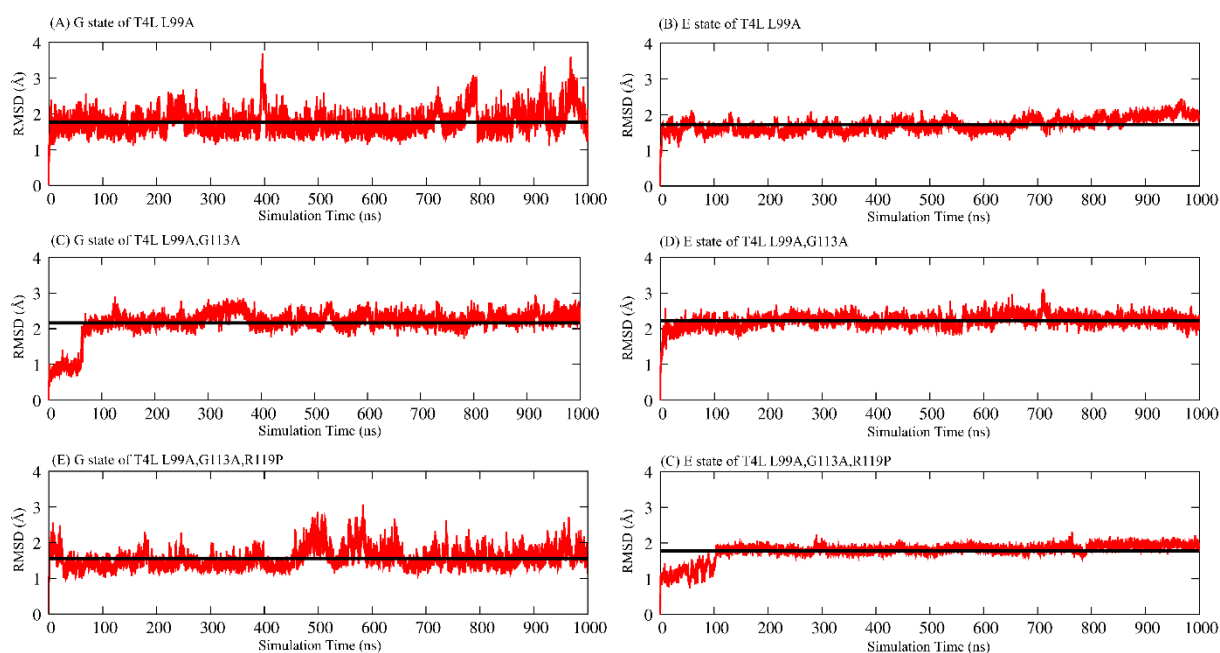

**Figure S10.** Unbiased MD simulations of the G and E states for all three mutants. Time evolution of the RMSD for the residues (92-140) within Cavity I and Cavity II for (A) the G state of T4L-L99A and (B) the E state of T4L-L99A; (C) the G state of T4L-L99A,G113A and (D) the E state of T4L-

L99A,G113A; (E) the G state of T4L-L99A,G113A,R119P and (F) the E state of T4L-L99A,G113A,R119P.

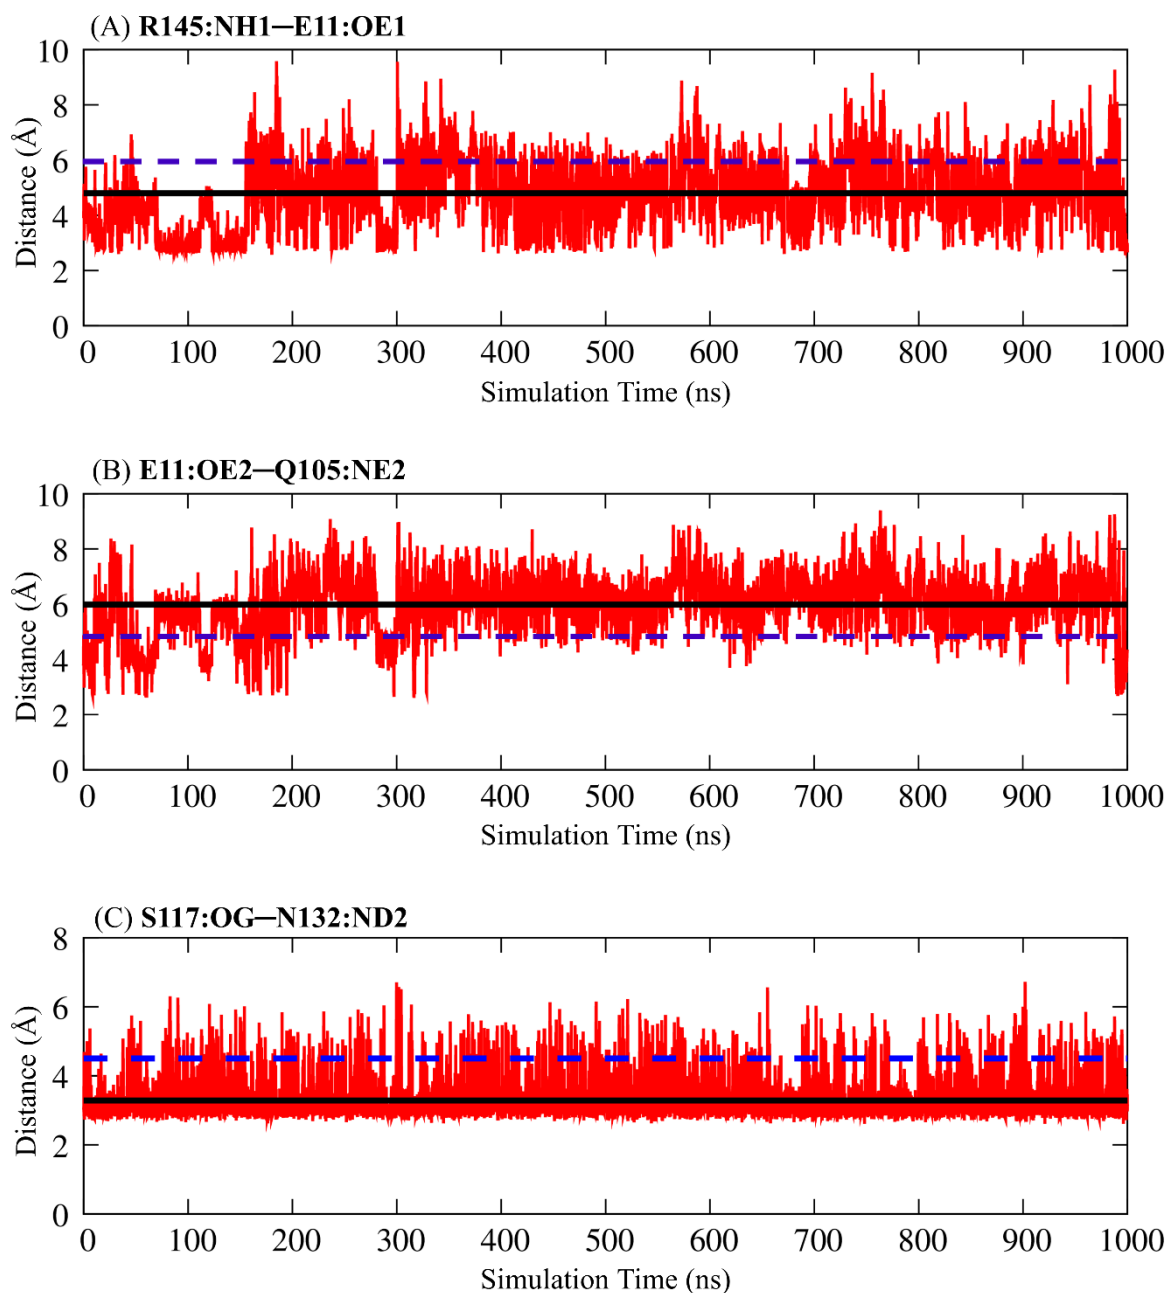

**Figure S11.** Unbiased MD simulation of the E state of the triple mutant T4L-L99A, G113A, R119P. (A) Time evolution of the distance between the atoms R145<sub>NH1</sub> and E11<sub>OE1</sub>. (B) Time evolution of the distance between E11<sub>OE2</sub> and Q105<sub>NE2</sub> (cut-off distance 5.0 Å). (C) Time evolution of the distance between S117<sub>OG</sub> and N132<sub>ND2</sub> (cut-off distance 4.5 Å).

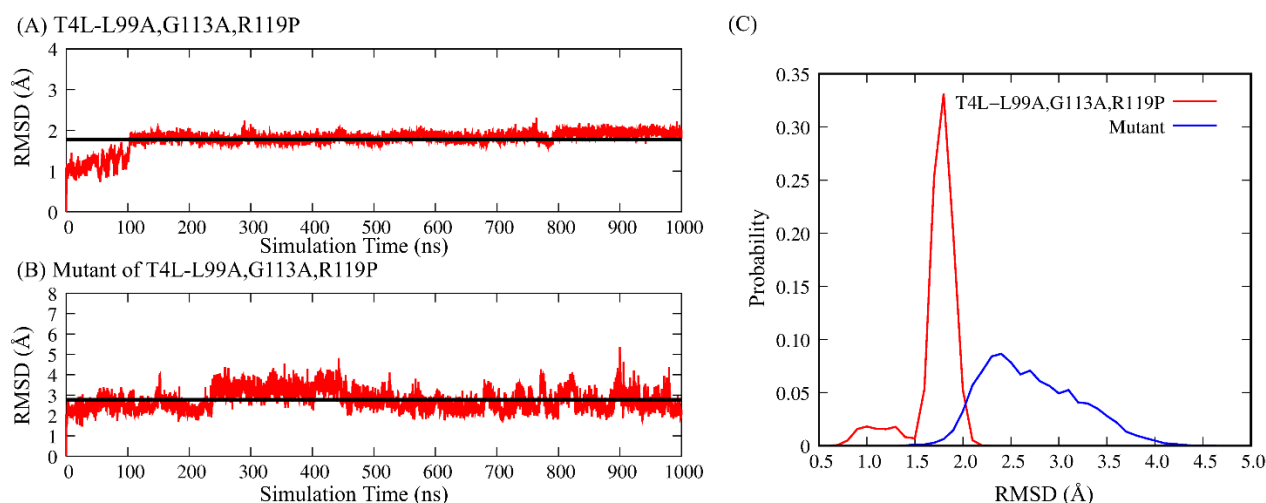

**Figure S12.** The RMSD for the residues (92-140) within cavity I and cavity II for triple mutant T4L-L99A, G113A, R119P and a sextuple mutant with three additional mutations Q105L, S117A and R145L. **(A)** Time evolution of RMSD for the E state of T4L-L99A,G113A,R119P; **(B)** Time evolution of RMSD for the E state of the sextuple mutant; **(C)** Probability distribution of the RMSD for the E state of the triple mutant (red line) and sextuple mutant (blue line).

**(A) T4L L99A**

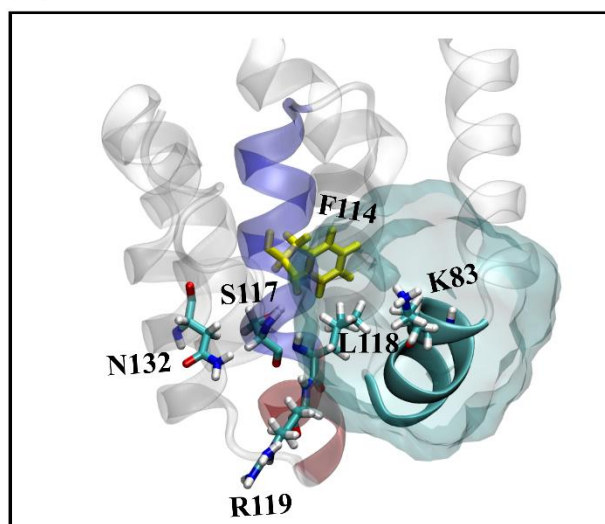

**(B) T4L L99A,G113A,R119P**

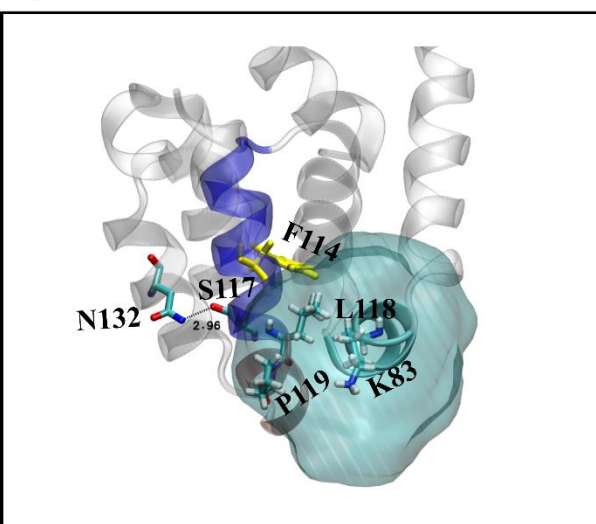

**Figure S13.** **(A,B)** The shape of the space within 6 Å around K83 (transparent, cyan) for the T4L-L99A **(A)**, and the T4L-L99A, G113A **(B)**. All the structures were displayed by VMD [15].

## References

1. Liu, L.; Baase, W.A.; Matthews, B. W. Halogenated benzenes bound within a non-polar cavity in T4 lysozyme provide examples of I...S and I...Se halogen-bonding. *J. Mol. Biol.*, **2009**, 385, 595-605. <https://doi.org/10.1016/j.jmb.2008.10.086>.
2. Bouvignies, G.; Vallurupalli, P.; Hansen, D. F.; Correia, B. E.; Lange, O.; Bah, A.; Vernon, R. M.; Dahlquist, F. W.; Baker, D.; Kay, L. E. Solution structure of a minor and transiently formed state of a T4 lysozyme mutant. *Nature* **2011**, 477, 111-114. <https://doi.org/10.1038/nature10349>.
3. Eswar, N.; Webb, B.; Marti-Renom, M.A.; Madhusudhan, M.S.; Eramian, D.; Shen M.; Pieper, U.; Sali A. Comparative protein structure modeling using Modeller. *Curr. Prot. Bioinf.*, **2006**, 15, 1-30. <https://doi.org/10.1002/0471250953.bi0506s15>.
4. Schlitter, J.; Engels, M.; Krüger, P. Targeted molecular dynamics: a new approach for searching pathways of conformational transitions. *J. Mol. Graphics* **1994**, 12, 84-89. [https://doi.org/10.1016/0263-7855\(94\)80072-3](https://doi.org/10.1016/0263-7855(94)80072-3).
5. Zhu, L. Z.; Sheong, F. K.; Cao, S. Q.; Liu, S.; Unarta, I. C.; Huang, X. TAPS: A traveling-salesman based automated path searching method for functional conformational changes of biological macromolecules. *J. Chem. Phys.* **2019**, 150, 124105. <https://doi.org/10.1063/1.5082633>.

6. Xi, K.; Hu, Z.; Wu, Q.; Wei, M.; Qian, R.; Zhu, L. Assessing the Performance of Traveling-salesman based Automated Path Searching (TAPS) on Complex Biomolecular Systems. *J. Chem. Theory Comput.*, **2021**, *17*, 5301-5311. <https://doi.org/10.1021/acs.jctc.1c00182>.
7. Cox, M.A.A.; Cox, T.F. Multidimensional scaling. In *Handbook of Data Visualization*; Chen, C.-h.; Härde, W.K.; Unwin, A., Eds.; Springer: Berlin, **2008**, pp 315-347. [https://doi.org/10.1007/978-3-540-33037-0\\_14](https://doi.org/10.1007/978-3-540-33037-0_14).
8. Laio, A.; Parrinello, M. Escaping free-energy minima. *Proc. Natl. Acad. Sci. USA*. **2002**, *99*, 12562-12566. <https://doi.org/10.1073/pnas.202427399>.
9. Fox, J.C.; Thomas, M.A.; Dishman, A.F.; Larsen, O.; Nakayama, T.; Yoshie, O.; Rosenkilde, M.M.; Volkman, B.F. Structure-function guided modeling of chemokine-GPCR specificity for the chemokine XCL1 and its receptor XCR1. *Science* **2019**, *12*, eaat4128. <https://doi.org/10.1126/scisignal.aat4128>.
10. Saunders, M.G.; Voth, G.A. Coarse-graining methods for computational biology. *Annu. Rev. Biophys.*, **2013**, *42*, 73-93. <https://doi.org/10.1146/annurev-biophys-083012-130348>.
11. Torrie, G.M.; Valleau, J.P. Nonphysical sampling distributions in Monte Carlo free-energy estimation: Umbrella sampling. *J. Comput. Phys.*, **1977**, *23*, 187-199. [https://doi.org/10.1016/0021-9991\(77\)90121-8](https://doi.org/10.1016/0021-9991(77)90121-8).
12. Barducci, A.; Bussi, G.; Parrinello, M. Well-tempered metadynamics: a smoothly converging and tunable free-energy method. *Phys. Rev. Lett.* **2008**, *100*, 020603. <https://doi.org/10.1103/physrevlett.100.020603>.
13. Kumar, S.; Rosenberg, J.M.; Bouzida, D.; Swendsen, R.H.; Kollman, P.A. The weighted histogram analysis method for free-energy calculations on biomolecules. I. The method. *J. Comput. Chem.* **1992**, *13*, 1011-1021. <https://doi.org/10.1002/jcc.540130812>.
14. Souaille, M.; Roux, B. Extension to the weighted histogram analysis method: combining umbrella sampling with free energy calculations. *Comput. Phys. Commun.* **2001**, *135*, 40-57. [https://doi.org/10.1016/S0010-4655\(00\)00215-0](https://doi.org/10.1016/S0010-4655(00)00215-0).
15. Humphrey, W.; Dalke, A.; Schulten, K. VMD: visual molecular dynamics. *J. Mol. Graph.* **1996**, *14*, 33-38. [https://doi.org/10.1016/0263-7855\(96\)00018-5](https://doi.org/10.1016/0263-7855(96)00018-5).
